# Supplementary material
Source: publisher figshare collection journal article supplement (https://wiley.figshare.com/ndownloader/files/17599172)
Supplement: Supplementary file 1 [file 17599172]

DATE_,year,GROUP,ADULTS,PUPS,animals,POINT_X,POINT_Y
19930523,1993,1,30,0,30,446210.7859,6469671.836
19930523,1993,2,27,0,27,447460.561,6470046.147
19930523,1993,3,2,0,2,447923.101,6470601.82
19930523,1993,4,1,0,1,448082.505,6470286.812
19930523,1993,5,7,0,7,449229.5149,6470442.525
19930523,1993,6,1,0,1,445994.9617,6472085.333
19930523,1993,1,10,1,11,438983.6983,6470444.335
19930523,1993,2,1,0,1,439725.7724,6470553.777
19930523,1993,3,75,0,75,446141.5916,6470143.448
19930523,1993,4,15,0,15,445971.0537,6469828.46
19930523,1993,5,2,0,2,444262.5018,6487808.947
19930523,1993,6,3,0,3,444328.0122,6488184.058
19930523,1995,1,10,1,11,438983.6983,6470444.335
19930523,1995,2,1,0,1,439725.7724,6470553.777
19930523,1995,3,75,0,75,446141.5916,6470143.448
19930523,1995,4,15,0,15,445971.0537,6469828.46
19930523,1995,5,2,0,2,444262.5018,6487808.947
19930523,1995,6,3,0,3,444328.0122,6488184.058
19960326,1996,1,35,1,36,439086.1713,6470231.204
19960326,1996,2,6,0,6,438556.2133,6473064.138
19960326,1996,3,15,0,15,440748.4574,6490191.533
19960326,1996,4,1,0,1,441580.2921,6489517.47
19960326,1996,5,2,0,2,442012.7866,6488262.822
19960326,1996,6,4,0,4,446870.3717,6485997.262
19960326,1996,7,3,0,3,445595.723,6491729.304
19960326,1996,8,12,0,12,444658.75,6492418.637
19960326,1996,9,2,0,2,442972.453,6493209.09
19960810,1996,1,11,4,15,438936.0348,6470293.973
19960810,1996,2,167,0,167,445904.8537,6470509.321
19960810,1996,3,1,0,1,433785.7522,6490092.802
19970503,1997,1,1,0,1,438785.6681,6470341.64
19970503,1997,2,7,0,7,439298.3739,6470273.257
19970503,1997,3,1,0,1,439548.6755,6470828.453
19970503,1997,4,1,0,1,445702.1213,6471146.629
19970503,1997,5,9,0,9,446236.7772,6470474.555
19970503,1997,6,28,0,28,446687.1021,6470256.9
19970503,1997,7,2,0,2,449178.1854,6487561.484
19970503,1997,8,1,0,1,449855.0134,6488725.912
19970503,1997,9,18,0,18,449325.9903,6489680.032
19980825,1998,1,3,0,3,438493.1225,6469925.611
19980825,1998,2,5,5,10,439013.8912,6469968.249
19980825,1998,3,1,0,1,439880.9407,6470259.341
19980825,1998,4,8,0,8,438863.7957,6470921.848
19980825,1998,5,2,1,3,439565.4409,6471190.005
19980825,1998,6,4,2,6,439810.9855,6471490.576
19980825,1998,7,1,0,1,439947.6296,6472135.121
19980825,1998,8,2,0,2,439439.2499,6472054.168
19980825,1998,9,1,0,1,439475.9146,6472788.88
19980825,1998,10,1,0,1,439115.7663,6472452.172
19980825,1998,11,3,0,3,438416.3247,6473122.22
19980825,1998,12,1,1,2,438572.7465,6473398.614
19980825,1998,13,2,0,2,438793.2879,6473724.688
19980825,1998,14,5,4,9,438775.249,6474193.844
19980825,1998,15,1,0,1,438387.6818,6474529.347
19980825,1998,16,67,28,95,438667.1612,6474575.657
19980825,1998,17,1,1,2,438635.0929,6474956.25
19980825,1998,18,1,0,1,438753.4329,6475233.114
19980825,1998,19,1,0,1,438250.9551,6477115.431
19980825,1998,20,1,0,1,438002.3661,6477410.568
19980825,1998,21,1,0,1,437781.938,6477882.495
19980825,1998,22,1,0,1,437201.951,6478678.178
19980825,1998,23,18,9,27,437089.7101,6479583.327
19980825,1998,24,1,0,1,437516.5482,6479853.246
19980825,1998,25,2,1,3,437719.025,6480112.45
19980825,1998,26,1,0,1,437609.1655,6480509.697
19980825,1998,27,2,0,2,437612.6038,6480849.898
19980825,1998,28,1,0,1,437615.8433,6481237.708
19980825,1998,29,5,3,8,436804.3691,6481751.221
19980825,1998,30,1,1,2,436377.5508,6482000.213
19980825,1998,31,20,0,20,436533.3204,6482439.638
19980825,1998,32,25,17,42,436249.2318,6483178.413
19980825,1998,33,1,0,1,436192.0311,6484309.063
19980825,1998,34,2,0,2,433650.1335,6488772.313
19980825,1998,35,1,0,1,432766.3507,6492247.742
19980825,1998,36,3,0,3,442299.8199,6493686.74
19980825,1998,37,2,0,2,442490.7754,6493476.938
19980825,1998,38,1,0,1,441246.6421,6490751.876
19980825,1998,39,4,0,4,441434.6427,6487744.432
19980825,1998,40,2,0,2,440936.9423,6487389.131
19980825,1998,41,1,0,1,439829.8448,6486174.87
19980825,1998,42,1,0,1,439770.8342,6484866.465
19980825,1998,43,1,0,1,444196.9494,6484295.208
19980825,1998,44,1,0,1,441232.3336,6482029.724
19980825,1998,45,1,0,1,443410.1557,6479194.137
19980825,1998,46,1,0,1,446139.4988,6479389.423
19980825,1998,47,1,0,1,446510.6351,6478994.835
19980825,1998,48,113,0,113,445860.8634,6470463.758
19980825,1998,49,58,0,58,446048.8861,6469940.639
19980825,1998,50,26,0,26,446770.5357,6470373.273
20040119,2004,1,2,0,2,445397.3917,6477619.58
20040119,2004,2,1,0,1,446049.8327,6474052.903
20040119,2004,3,2,0,2,439042.6166,6469772.89
20040119,2004,4,17,0,17,439181.8041,6470886.389
20040119,2004,5,1,0,1,439599.3663,6471721.514
20040119,2004,6,2,0,2,439320.9915,6472382.654
20040119,2004,7,6,0,6,438555.4607,6474157.293
20040119,2004,8,1,0,1,438068.3048,6479272.431
20040119,2004,9,1,0,1,443357.5674,6479724.86
20040119,2004,10,1,0,1,442737.7176,6480109.39
20040119,2004,11,2,0,2,441757.7526,6480952.468
20040119,2004,12,4,0,4,436686.8189,6482496.412
20040119,2004,13,1,0,1,442116.5896,6483181.035
20040119,2004,14,2,0,2,442753.9975,6483346.289
20040119,2004,15,1,0,1,445681.3522,6482968.566
20040119,2004,16,1,0,1,446295.1523,6484314.205
20040119,2004,17,1,0,1,448419.8452,6484762.751
20040119,2004,18,1,0,1,448514.276,6485825.097
20040119,2004,19,2,0,2,447404.7142,6485730.666
20040119,2004,20,2,0,2,440558.4815,6485187.689
20040119,2004,21,2,0,2,439991.8968,6486320.859
20040119,2004,22,5,0,5,441148.674,6487690.105
20040119,2004,23,21,0,21,441337.5356,6488327.513
20040119,2004,24,2,0,2,441880.5127,6488539.983
20040119,2004,25,5,0,5,442258.2358,6487878.967
20040119,2004,26,7,0,7,442494.3128,6487194.344
20040119,2004,27,3,0,3,442942.8591,6486745.797
20040119,2004,28,1,0,1,430737.6788,6492931.015
20040119,2004,29,4,0,4,440204.366,6490145.306
20040119,2004,30,2,0,2,441715.2588,6489555.114
20040119,2004,31,5,0,5,443273.3669,6489130.175
20040119,2004,32,12,0,12,444689.8288,6487029.09
20040119,2004,33,44,0,44,445256.4136,6487572.067
20040119,2004,34,5,0,5,445232.8059,6486061.174
20040119,2004,35,1,0,1,447876.8681,6487170.736
20040119,2004,36,94,0,94,446602.0524,6488138.652
20040119,2004,37,4,0,4,447475.5373,6489271.821
20040119,2004,38,8,0,8,450190.4226,6489319.037
20040119,2004,39,13,0,13,445586.9214,6490121.698
20040119,2004,40,3,0,3,444925.9058,6490428.598
20040119,2004,41,1,0,1,448939.2146,6491915.884
20040119,2004,42,2,0,2,446342.3677,6492081.137
20040119,2004,43,11,0,11,445657.7445,6491986.707
20040119,2004,44,4,0,4,445374.4521,6493497.599
20040119,2004,45,2,0,2,442919.2514,6491514.553
20040119,2004,46,52,0,52,443887.167,6493190.699
20040119,2004,47,12,0,12,443226.1515,6492860.191
20040119,2004,48,4,0,4,442659.5667,6492812.976
20040119,2004,49,3,0,3,442163.805,6493237.915
20040119,2004,50,9,0,9,442045.7665,6493450.384
20040119,2004,51,15,0,15,444076.0286,6495386.215
20040119,2004,52,12,0,12,444642.6134,6495740.331
20040119,2004,53,1,0,1,449930.7379,6495150.138
20040119,2004,54,3,0,3,441243.1048,6495409.823
20040119,2004,55,1,0,1,440676.52,6495339
20040119,2004,56,5,0,5,440346.0122,6493969.753
20040119,2004,57,2,0,2,446223.2994,6498422.708
20040119,2004,58,2,0,2,445102.9401,6498864.062
20040119,2004,59,1,0,1,444593.6859,6500867.129
20040119,2004,60,4,0,4,444220.2327,6497913.454
20040119,2004,61,8,0,8,444559.7356,6496623.343
20040119,2004,62,5,0,5,442454.818,6496657.294
20040119,2004,63,2,0,2,442522.7186,6497777.653
20040119,2004,64,4,0,4,442013.4643,6499916.521
20040119,2004,65,1,0,1,441504.2101,6501919.587
20040119,2004,66,1,0,1,441640.0112,6502734.394
20040226,2004,1,1,0,1,446330.0881,6476400.812
20040226,2004,2,2,0,2,446854.8382,6479286.938
20040226,2004,3,1,0,1,445243.1057,6478780.929
20040226,2004,4,6,0,6,439485.3861,6470148.715
20040226,2004,5,8,0,8,440357.9153,6470936.12
20040226,2004,6,25,0,25,439825.8853,6471234.056
20040226,2004,7,1,0,1,439570.5109,6471702.243
20040226,2004,8,2,0,2,439357.6989,6472255.554
20040226,2004,9,2,0,2,439166.1681,6473191.927
20040226,2004,10,8,0,8,439591.7921,6473468.582
20040226,2004,11,15,0,15,438612.8569,6474085.737
20040226,2004,12,2,0,2,438761.8253,6477767.385
20040226,2004,13,2,0,2,443144.5524,6507800.583
20040226,2004,14,2,0,2,444243.1105,6506434.084
20040226,2004,15,2,0,2,443439.2875,6506166.143
20040226,2004,16,2,0,2,442126.3766,6505603.467
20040226,2004,17,38,0,38,442847.0132,6504228.697
20040226,2004,18,19,0,19,443246.0357,6503463.904
20040226,2004,19,2,0,2,441902.66,6503217.84
20040226,2004,20,1,0,1,443299.2387,6501106.346
20040226,2004,21,4,0,4,440665.6903,6498206.783
20040226,2004,22,1,0,1,441809.5548,6498259.986
20040226,2004,23,1,0,1,442235.1788,6498020.572
20040226,2004,24,6,0,6,441410.5323,6497116.121
20040226,2004,25,2,0,2,442102.1713,6496078.663
20040226,2004,26,2,0,2,441676.5473,6496078.663
20040226,2004,27,1,0,1,443246.0357,6496690.497
20040226,2004,28,4,0,4,443405.6447,6498073.775
20040226,2004,29,4,0,4,443565.2537,6497860.963
20040226,2004,30,41,0,41,445054.9377,6496823.505
20040226,2004,31,25,0,25,446104.0776,6496072.822
20040226,2004,32,1,0,1,445823.5482,6481975.538
20040226,2004,33,1,0,1,443534.8397,6485206.656
20040226,2004,34,1,0,1,442087.5681,6484668.137
20040226,2004,35,27,0,27,444275.3042,6485509.574
20040226,2004,36,5,0,5,445520.6309,6485980.778
20040226,2004,37,1,0,1,445958.1781,6485038.369
20040226,2004,38,2,0,2,439664.2296,6485004.711
20040226,2004,39,2,0,2,439495.9422,6485879.806
20040226,2004,40,6,0,6,439327.6548,6486115.408
20040226,2004,41,7,0,7,439798.8595,6486250.038
20040226,2004,42,1,0,1,440236.4068,6486384.668
20040226,2004,43,1,0,1,441178.8162,6487327.077
20040226,2004,44,9,0,9,440875.8988,6487562.68
20040226,2004,45,21,0,21,441279.7886,6488303.144
20040226,2004,46,4,0,4,441851.9657,6487932.912
20040226,2004,47,34,0,34,439798.8595,6488673.377
20040226,2004,48,6,0,6,440875.8988,6489009.951
20040226,2004,49,3,0,3,441448.076,6489312.869
20040226,2004,50,6,0,6,441784.6508,6489750.416
20040226,2004,51,16,0,16,440606.639,6491466.947
20040226,2004,52,1,0,1,442558.7728,6490524.538
20040226,2004,53,6,0,6,443164.6074,6488101.199
20040226,2004,54,8,0,8,444241.6467,6486620.27
20040226,2004,55,1,0,1,442693.4027,6486754.9
20040226,2004,56,23,0,23,445298.4915,6486677.488
20040226,2004,57,33,0,33,445621.6033,6487162.156
20040226,2004,58,11,0,11,444867.6758,6487377.564
20040226,2004,59,22,0,22,445594.6774,6487539.119
20040226,2004,60,2,0,2,447102.5324,6486919.822
20040226,2004,61,18,0,18,447021.7545,6487512.193
20040226,2004,62,3,0,3,448691.1654,6486165.894
20040226,2004,63,1,0,1,448206.4977,6486542.858
20040226,2004,64,2,0,2,450037.4645,6487485.268
20040226,2004,65,3,0,3,450037.4645,6488696.937
20040226,2004,66,13,0,13,449956.6866,6489720.124
20040226,2004,67,2,0,2,450037.4645,6490527.904
20040226,2004,68,1,0,1,449714.3528,6490339.422
20040226,2004,69,58,0,58,449202.7591,6489639.346
20040226,2004,70,1,0,1,448664.2394,6490743.311
20040226,2004,71,10,0,10,448206.4977,6490635.608
20040226,2004,72,9,0,9,448368.0536,6489531.642
20040226,2004,73,11,0,11,446940.9765,6488400.751
20040226,2004,74,7,0,7,446483.2348,6488589.233
20040226,2004,75,6,0,6,446025.4931,6488670.011
20040226,2004,76,3,0,3,447506.4221,6491642.639
20040226,2004,77,8,0,8,445863.9372,6490673.304
20040226,2004,78,2,0,2,445863.9372,6490188.636
20040226,2004,79,1,0,1,443952.1924,6489461.635
20040226,2004,80,1,0,1,444409.9341,6492154.233
20040226,2004,81,3,0,3,443440.5987,6492100.381
20040226,2004,82,3,0,3,443144.4129,6492127.307
20040226,2004,83,2,0,2,445352.3435,6492638.901
20040226,2004,84,9,0,9,443063.635,6493096.642
20040226,2004,85,20,0,20,443790.6365,6493015.864
20040226,2004,86,3,0,3,443440.5987,6494119.83
20040226,2004,87,25,0,25,442202.0035,6494012.126
20040226,2004,88,1,0,1,445810.0852,6492235.011
20040226,2004,89,6,0,6,444867.6758,6494846.831
20040226,2004,90,13,0,13,443736.7845,6495008.387
20040226,2004,91,42,0,42,443332.8948,6495116.091
20040226,2004,92,26,0,26,443548.3027,6495412.277
20040226,2004,93,5,0,5,443629.0806,6496139.278
20040226,2004,94,3,0,3,441825.0397,6495439.203
20040226,2004,95,3,0,3,447910.3119,6494523.719
20040226,2004,96,30,0,30,446967.9025,6495089.165
20040323,2004,1,1,0,1,438892.3615,6470443.142
20040323,2004,2,11,0,11,439567.804,6470293.043
20040323,2004,3,16,0,16,439830.4762,6471193.633
20040323,2004,4,5,0,5,438779.7877,6473032.338
20040323,2004,5,39,0,39,438629.6893,6474195.6
20040323,2004,6,8,0,8,438610.9271,6475816.663
20040323,2004,7,2,0,2,438520.868,6476447.076
20040323,2004,8,3,0,3,438430.809,6477707.902
20040323,2004,9,4,0,4,438100.5927,6481100.125
20040323,2004,10,1,0,1,447406.6905,6479178.866
20040323,2004,11,1,0,1,445365.3529,6478128.177
20040323,2004,12,5,0,5,443564.1727,6479509.082
20040323,2004,13,1,0,1,446716.2381,6484282.21
20040323,2004,14,1,0,1,448367.3199,6484492.347
20040323,2004,15,1,0,1,448577.4576,6486563.705
20040323,2004,16,1,0,1,449057.7723,6487434.275
20040323,2004,17,1,0,1,449207.8707,6488244.806
20040323,2004,18,2,0,2,450258.5592,6489655.731
20040323,2004,19,42,0,42,444584.8415,6485362.918
20040323,2004,20,25,0,25,444855.0185,6486023.35
20040323,2004,21,21,0,21,445905.707,6486503.665
20040323,2004,22,1,0,1,446536.12,6486533.685
20040323,2004,23,1,1,2,446746.2577,6487614.393
20040323,2004,24,9,0,9,446896.3561,6487974.629
20040323,2004,25,1,0,1,447676.8675,6487854.55
20040323,2004,26,6,0,6,445725.5889,6487644.413
20040323,2004,27,39,0,39,448877.6543,6489595.691
20040323,2004,28,9,0,9,448067.1232,6489715.77
20040323,2004,29,1,0,1,448877.6543,6491036.635
20040323,2004,30,2,0,2,448217.2216,6491576.989
20040323,2004,31,3,0,3,446145.8643,6490136.045
20040323,2004,32,3,0,3,445185.2349,6489955.927
20040323,2004,33,1,0,1,445845.6676,6491757.108
20040323,2004,34,1,0,1,443293.9956,6485362.918
20040323,2004,35,8,0,8,443173.917,6486773.842
20040323,2004,36,2,0,2,443624.212,6487764.491
20040323,2004,37,6,0,6,443474.1137,6488334.865
20040323,2004,38,52,0,52,443263.976,6489175.416
20040323,2004,39,22,0,22,440682.2843,6488995.298
20040323,2004,40,13,0,13,441372.7367,6489955.927
20040323,2004,41,7,0,7,441672.9334,6490406.222
20040323,2004,42,13,0,13,441222.6384,6490976.596
20040323,2004,43,3,0,3,440592.2253,6490886.537
20040323,2004,44,1,0,1,441162.599,6492057.304
20040323,2004,45,22,0,22,443203.9366,6493498.248
20040323,2004,46,30,0,30,442513.4842,6493798.445
20040323,2004,47,65,0,65,440712.304,6493618.327
20040323,2004,48,20,0,20,441492.8154,6494638.996
20040323,2004,49,47,0,47,443834.3497,6495239.389
20040323,2004,50,9,0,9,443414.0743,6495659.665
20040323,2004,51,9,0,9,442273.3268,6495839.783
20040323,2004,52,24,0,24,447887.0052,6494368.819
20040323,2004,53,1,0,1,448367.3199,6494789.094
20040323,2004,54,30,0,30,447616.8282,6494669.016
20040323,2004,55,9,0,9,446866.3364,6495059.271
20040323,2004,56,2,0,2,446836.3167,6496350.117
20040323,2004,57,5,0,5,446446.061,6496590.274
20040323,2004,58,4,0,4,437890.455,6481640.479
20040323,2004,59,18,0,18,442513.4842,6500492.832
20040323,2004,60,1,0,1,441853.0515,6499862.419
20040323,2004,61,7,0,7,441762.9924,6501123.245
20040323,2004,62,2,0,2,442663.5826,6498121.278
20040323,2004,63,12,0,12,440862.4023,6502233.972
20040323,2004,64,28,0,28,440952.4613,6502924.425
20040323,2004,65,34,0,34,439721.6549,6502594.209
20040323,2004,66,2,0,2,441072.54,6504155.231
20040323,2004,67,4,0,4,442093.2088,6504785.644
20040323,2004,68,83,0,83,443113.8776,6508087.808
20040323,2004,69,1,0,1,440742.3236,6508958.379
20040323,2004,70,10,0,10,440231.9893,6506556.805
20040323,2004,71,1,0,1,438160.632,6504965.762
20040410,2004,1,1,0,1,445538.8092,6471340.824
20040410,2004,2,2,0,2,446551.1475,6478933.361
20040410,2004,3,1,0,1,446348.6798,6478562.17
20040410,2004,4,2,0,2,438756.1433,6469383.637
20040410,2004,5,55,0,55,439161.0786,6470193.508
20040410,2004,6,3,0,3,439532.2692,6470260.997
20040410,2004,7,7,0,7,439768.4815,6470935.889
20040410,2004,8,4,0,4,439802.2261,6471678.27
20040410,2004,9,34,0,34,438823.6325,6473028.055
20040410,2004,10,77,0,77,438823.6325,6473534.224
20040410,2004,11,1,0,1,437811.2943,6480451.868
20040410,2004,12,1,0,1,441624.4349,6481160.505
20040410,2004,13,1,0,1,440173.4168,6484872.412
20040410,2004,14,2,0,2,440814.5643,6485074.879
20040410,2004,15,4,0,4,442771.7515,6486863.343
20040410,2004,16,2,0,2,441658.1795,6487571.98
20040410,2004,17,62,0,62,441388.2226,6487774.448
20040410,2004,18,7,0,7,441523.201,6488820.531
20040410,2004,19,4,0,4,440004.6937,6487538.236
20040410,2004,20,1,0,1,439802.2261,6486964.577
20040410,2004,21,16,0,16,440882.0535,6489529.167
20040410,2004,22,8,0,8,440544.6074,6490204.06
20040410,2004,23,7,0,7,440882.0535,6490676.484
20040410,2004,24,2,0,2,441152.0104,6490946.441
20040410,2004,25,29,0,29,440612.0966,6491047.675
20040410,2004,26,3,0,3,444097.9145,6485965.737
20040410,2004,27,3,0,3,444664.8239,6486640.629
20040410,2004,28,9,0,9,445312.7204,6487180.543
20040410,2004,29,16,0,16,444313.88,6487153.547
20040410,2004,30,1,0,1,450387.9093,6487990.413
20040410,2004,31,1,0,1,447499.3709,6487045.564
20040410,2004,32,1,0,1,446554.5219,6488503.331
20040410,2004,33,20,0,20,443692.9793,6488962.258
20040410,2004,34,3,0,3,444151.9059,6489151.228
20040410,2004,35,3,0,3,446068.5996,6489988.094
20040410,2004,36,1,0,1,448201.2587,6490312.042
20040410,2004,37,3,0,3,445501.6902,6490851.956
20040410,2004,38,4,0,4,445474.6945,6491337.878
20040410,2004,39,16,0,16,445069.7592,6491985.775
20040410,2004,40,12,0,12,444286.8843,6492120.753
20040410,2004,41,8,0,8,443935.9404,6492552.684
20040410,2004,42,3,0,3,443045.0828,6493254.572
20040410,2004,43,26,0,26,442505.1691,6493524.529
20040410,2004,44,3,0,3,442316.1993,6493929.464
20040410,2004,45,6,0,6,443315.0397,6494982.296
20040410,2004,46,60,0,60,442883.1087,6495441.223
20040410,2004,47,2,0,2,442478.1734,6496062.123
20040410,2004,48,1,0,1,447094.4356,6493632.512
20040410,2004,49,7,0,7,437021.9868,6481692.404
20040410,2004,50,1,0,1,433040.1232,6487496.477
20040410,2004,51,1,0,1,431352.8929,6494110.42
20040410,2004,52,1,0,1,430003.1086,6494987.779
20040410,2004,53,8,0,8,442998.1567,6499968.483
20040410,2004,54,1,0,1,442620.2171,6499455.565
20040410,2004,55,1,0,1,443673.0488,6499401.574
20040410,2004,56,3,0,3,442539.2301,6498564.708
20040410,2004,57,2,0,2,443376.0963,6498537.712
20040410,2004,58,4,0,4,442593.2214,6497754.837
20040410,2004,59,9,0,9,441324.4242,6499968.483
20040410,2004,60,8,0,8,439623.696,6499968.483
20040410,2004,61,3,0,3,441216.4415,6500994.319
20040410,2004,62,2,0,2,441054.4674,6501966.164
20040410,2004,63,2,0,2,441459.4026,6506528.435
20040410,2004,64,67,0,67,442944.1653,6508040.193
20040410,2004,65,1,0,1,441432.407,6508202.167
20040410,2004,66,1,0,1,440541.5493,6508040.193
20040410,2004,67,8,0,8,440757.5148,6508634.098
20040410,2004,68,25,0,25,440757.5148,6509767.917
20040410,2004,69,2,0,2,441270.4328,6509875.9
20040410,2004,70,16,0,16,440541.5493,6510739.762
20040604,2004,1,2,0,2,445517.6577,6476648.32
20040604,2004,2,45,0,45,439350.7787,6470084.142
20040604,2004,3,2,0,2,439521.1457,6470393.9
20040604,2004,4,1,0,1,439722.4884,6471028.904
20040604,2004,5,1,0,1,439149.436,6470471.34
20040604,2004,6,1,1,2,439195.8997,6470889.513
20040604,2004,7,5,0,5,439335.2908,6471261.223
20040604,2004,8,1,0,1,439567.6094,6471586.469
20040604,2004,9,10,0,10,439025.5328,6472484.767
20040604,2004,10,5,0,5,438994.557,6472624.158
20040604,2004,11,3,0,3,438932.6054,6472763.55
20040604,2004,12,70,0,70,438870.6537,6472949.404
20040604,2004,13,40,0,40,438808.7021,6473352.09
20040604,2004,14,10,0,10,438731.2626,6473770.263
20040604,2004,15,3,0,3,438313.0892,6473646.36
20040604,2004,16,7,0,7,438700.2868,6474451.731
20040604,2004,17,1,0,1,443146.7519,6479237.115
20040604,2004,18,1,0,1,446341.1319,6484149.684
20040604,2004,19,1,0,1,445324.7382,6486472.87
20040604,2004,20,1,0,1,445252.1387,6486690.668
20040604,2004,21,2,0,2,445227.9388,6487005.266
20040604,2004,22,3,0,3,444743.9419,6486400.27
20040604,2004,23,1,0,1,442662.7549,6486593.869
20040604,2004,24,1,0,1,446679.9297,6487465.063
20040604,2004,25,1,0,1,450092.1084,6489352.652
20040604,2004,26,7,0,7,441017.1652,6487223.065
20040604,2004,27,25,0,25,441355.9631,6487803.861
20040604,2004,28,1,0,1,439903.9722,6487489.263
20040604,2004,29,2,0,2,439855.5725,6487852.261
20040604,2004,30,2,0,2,441428.5626,6488481.457
20040604,2004,31,1,0,1,441259.1637,6488723.456
20040604,2004,32,2,0,2,441162.3643,6488965.454
20040604,2004,33,1,0,1,441041.365,6489231.652
20040604,2004,34,1,0,1,440968.7655,6489764.049
20040604,2004,35,2,0,2,440291.1697,6488820.255
20040604,2004,36,20,0,20,440460.5687,6491312.839
20040604,2004,37,3,0,3,441283.3635,6490780.443
20040604,2004,38,3,0,3,441113.9646,6491821.036
20040604,2004,39,5,0,5,441065.5649,6492135.634
20040604,2004,40,10,0,10,440871.9661,6492571.231
20040604,2004,41,1,0,1,447502.7246,6491603.238
20040604,2004,42,1,0,1,447067.1273,6490877.242
20040604,2004,43,1,0,1,450067.9085,6495959.21
20040604,2004,44,1,0,1,444937.5406,6495160.615
20040604,2004,45,1,0,1,444090.5459,6494120.022
20040604,2004,46,40,0,40,443412.9502,6495305.814
20040604,2004,47,17,0,17,442130.3582,6495402.614
20040604,2004,48,1,0,1,441065.5649,6495112.216
20040604,2004,49,1,0,1,431676.0236,6486448.67
20040604,2004,50,1,0,1,432595.6179,6486835.867
20040604,2004,51,1,0,1,435910.9971,6486521.269
20040604,2004,52,3,0,3,436588.5929,6482891.292
20040604,2004,53,1,0,1,441557.1243,6495872.998
20040604,2004,54,1,0,1,442373.8692,6496901.492
20040604,2004,55,2,0,2,444219.1076,6496568.744
20040604,2004,56,3,0,3,444158.608,6497869.486
20040604,2004,57,1,0,1,445247.6012,6498111.484
20040604,2004,58,1,0,1,442615.8677,6500077.722
20040604,2004,59,4,0,4,442857.8662,6499744.974
20040604,2004,60,11,0,11,442948.6156,6499351.727
20040604,2004,61,15,0,15,443099.8646,6498867.73
20040604,2004,62,1,0,1,443220.8639,6498413.982
20040604,2004,63,1,0,1,442222.6201,6499291.227
20040604,2004,64,1,0,1,442494.8684,6498141.734
20040604,2004,65,2,0,2,441315.1258,6499442.476
20040604,2004,66,5,0,5,441224.3764,6500138.222
20040604,2004,67,2,0,2,439379.1379,6499986.973
20040604,2004,68,1,0,1,439772.3855,6499684.474
20040604,2004,69,1,0,1,440498.3809,6499321.477
20040708,2004,1,2,0,2,442415.1751,6480485.64
20040708,2004,2,3,0,3,437574.1761,6480380.018
20040708,2004,3,1,0,1,439458.3934,6475066.821
20040708,2004,4,2,0,2,439387.1227,6474259.087
20040708,2004,5,28,0,28,438555.632,6474187.816
20040708,2004,6,55,0,55,438555.632,6473736.436
20040708,2004,7,1,0,1,439434.6365,6472738.647
20040708,2004,8,4,0,4,439695.9622,6471051.909
20040708,2004,9,14,0,14,439482.1502,6470386.716
20040708,2004,10,3,0,3,439149.5539,6470315.445
20040708,2004,11,1,0,1,438650.6595,6470196.661
20040708,2004,12,2,0,2,437578.4324,6481284.788
20040708,2004,13,43,0,43,436368.8113,6482978.257
20040708,2004,14,4,0,4,436071.0584,6483815.687
20040708,2004,15,1,0,1,443012.4224,6487593.427
20040708,2004,16,1,0,1,446194.6563,6488058.666
20040708,2004,17,1,0,1,440500.1325,6488896.096
20040708,2004,18,25,0,25,441039.8096,6490124.326
20040708,2004,19,3,0,3,439965.1078,6489794.007
20040708,2004,20,3,0,3,439988.3697,6490398.817
20040708,2004,21,1,0,1,439360.2973,6490747.747
20040708,2004,22,350,0,350,440825.7997,6490910.58
20040708,2004,23,3,0,3,441058.4191,6491422.343
20040708,2004,24,1,0,1,441686.4916,6491980.63
20040708,2004,25,1,0,1,440662.9661,6492306.297
20040708,2004,26,1,0,1,440686.228,6492818.06
20040708,2004,27,70,0,70,442942.6366,6493376.346
20040708,2004,28,1,0,1,442268.0402,6494609.229
20040708,2004,29,2,0,2,442221.5163,6495260.564
20040708,2004,30,2,0,2,449502.5046,6495004.682
20040708,2004,31,1,0,1,442500.6596,6496493.447
20040708,2004,32,1,0,1,442872.8507,6496563.232
20040708,2004,33,33,0,33,444245.3054,6499005.737
20040708,2004,34,11,0,11,444012.686,6499540.761
20040708,2004,35,4,0,4,443803.3285,6500052.524
20040901,2004,1,1,0,1,446267.3993,6469917.716
20040901,2004,2,6,0,6,446229.9836,6470778.277
20040901,2004,3,1,0,1,446080.3208,6472312.321
20040901,2004,4,14,0,14,437661.7869,6469580.974
20040901,2004,5,2,0,2,438110.7753,6469655.806
20040901,2004,6,1,0,1,439457.7408,6470291.873
20040901,2004,7,6,0,6,439719.6507,6470628.614
20040901,2004,8,2,0,2,439008.7523,6470927.94
20040901,2004,9,1,0,1,439382.9094,6471152.434
20040901,2004,10,3,0,3,438529.8313,6473262.68
20040901,2004,11,13,0,13,438859.0895,6473322.545
20040901,2004,12,5,0,5,438529.8313,6473741.601
20040901,2004,13,30,0,30,438859.0895,6473921.196
20040901,2004,14,1,0,1,438619.629,6474400.117
20040901,2004,15,2,0,2,438230.5056,6476375.666
20040901,2004,16,1,0,1,438440.0336,6477782.497
20040901,2004,17,1,0,1,437721.652,6480386.63
20040901,2004,18,2,0,2,437661.7869,6481075.079
20040901,2004,19,2,0,2,438080.8428,6481164.877
20040901,2004,20,2,0,2,438110.7753,6480656.023
20040901,2004,21,2,0,2,437482.1915,6481643.798
20040901,2004,22,6,0,6,437152.9333,6481793.461
20040901,2004,23,9,0,9,437063.1356,6482511.842
20040901,2004,24,1,0,1,436105.2935,6482871.033
20040901,2004,25,1,0,1,435955.6307,6483320.022
20040901,2004,26,2,0,2,436015.4958,6483649.28
20040901,2004,27,1,0,1,435327.0468,6486612.604
20040901,2004,28,1,0,1,435237.2491,6487420.783
20040901,2004,29,1,0,1,434997.7886,6487720.109
20040901,2004,30,1,0,1,434369.2047,6487869.771
20040901,2004,31,1,0,1,430657.5667,6486073.818
20040901,2004,32,1,0,1,433201.8347,6487570.446
20040901,2004,33,1,0,1,432513.3857,6488258.895
20040901,2004,34,1,0,1,431944.6669,6488468.423
20040901,2004,35,1,0,1,432243.9926,6489097.007
20040901,2004,36,2,0,2,434309.3396,6488707.883
20040901,2004,37,2,0,2,433980.0814,6489486.13
20040901,2004,38,2,0,2,433860.3511,6489965.051
20040901,2004,39,1,0,1,433381.4301,6489815.388
20040901,2004,40,1,0,1,434010.0139,6490533.77
20040901,2004,41,1,0,1,433680.7557,6490713.365
20040901,2004,42,1,0,1,430747.3643,6492988.24
20040901,2004,43,10,0,10,430837.162,6492688.914
20040901,2004,44,1,0,1,431016.7574,6492479.386
20040901,2004,45,1,0,1,432363.7229,6492479.386
20040901,2004,46,1,0,1,432722.9136,6492718.847
20040901,2004,47,2,0,2,431914.7344,6492688.914
20040901,2004,48,4,0,4,431316.0831,6493048.105
20040901,2004,49,8,0,8,431645.3413,6493107.97
20040901,2004,50,4,1,5,431375.9482,6493377.363
20040901,2004,51,2,0,2,431495.6785,6493856.284
20040901,2004,52,2,0,2,431256.218,6493976.015
20040901,2004,53,1,0,1,431136.4877,6495143.385
20040901,2004,54,1,0,1,430657.5667,6495921.631
20040901,2004,55,1,0,1,429819.4548,6494365.138
20040901,2004,56,1,0,1,447565.7243,6484479.908
20040901,2004,57,2,0,2,445290.8494,6484958.83
20040901,2004,58,1,0,1,445590.175,6485647.279
20040901,2004,59,1,0,1,445051.3889,6485677.211
20040901,2004,60,1,0,1,445889.5007,6487772.491
20040901,2004,61,1,0,1,450020.1947,6490167.096
20040901,2004,62,2,0,2,443135.7047,6486575.188
20040901,2004,63,1,0,1,443943.884,6486485.39
20040901,2004,64,1,0,1,443913.9514,6487353.435
20040901,2004,65,1,0,1,443494.8955,6488969.793
20040901,2004,66,1,0,1,443764.2886,6488909.928
20040901,2004,67,3,0,3,445470.4448,6490167.096
20040901,2004,68,1,0,1,447296.3312,6491903.185
20040901,2004,69,1,0,1,441579.2113,6487742.558
20040901,2004,70,3,1,4,441339.7508,6487862.288
20040901,2004,71,1,0,1,440202.3133,6487233.704
20040901,2004,72,1,0,1,441190.088,6488221.479
20040901,2004,73,1,0,1,440711.1669,6488730.333
20040901,2004,74,7,0,7,440681.2344,6489239.186
20040901,2004,75,25,0,25,440651.3018,6489957.568
20040901,2004,76,22,0,22,440771.0321,6490346.691
20040901,2004,77,3,0,3,441399.6159,6489358.917
20040901,2004,78,2,0,2,441429.5485,6488850.063
20040901,2004,79,7,0,7,439783.2574,6488550.737
20040901,2004,80,1,0,1,440052.6505,6489179.321
20040901,2004,81,3,0,3,439932.9202,6489957.568
20040901,2004,82,2,0,2,439244.4712,6489987.5
20040901,2004,83,1,0,1,438945.1456,6489179.321
20040901,2004,84,1,0,1,439873.0551,6490436.489
20040901,2004,85,1,0,1,439064.8759,6490586.152
20040901,2004,86,4,0,4,443225.5024,6490137.163
20040901,2004,87,2,0,2,442327.5254,6490077.298
20040901,2004,88,2,0,2,441938.4021,6490556.219
20040901,2004,89,2,0,2,443135.7047,6491035.14
20040901,2004,90,1,0,1,442327.5254,6491005.208
20040901,2004,91,1,0,1,441249.9531,6485108.492
20040901,2004,92,52,0,52,440411.8413,6491364.398
20040901,2004,93,2,0,2,440441.7739,6491873.252
20040901,2004,94,1,0,1,439783.2574,6491603.859
20040901,2004,95,1,0,1,438316.5617,6491454.196
20040901,2004,96,48,0,48,440741.0995,6492531.768
20040901,2004,97,1,0,1,443674.4909,6491783.454
20040901,2004,98,1,0,1,443285.3675,6491573.926
20040901,2004,99,1,0,1,442956.1093,6491723.589
20040901,2004,100,10,0,10,443195.5698,6491933.117
20040901,2004,101,2,2,4,444871.7935,6492082.78
20040901,2004,102,1,0,1,445560.2425,6492561.701
20040901,2004,103,1,0,1,445021.4563,6492561.701
20040901,2004,104,2,0,2,445350.7145,6493190.285
20040901,2004,105,1,0,1,442866.3116,6492112.713
20040901,2004,106,10,0,10,442836.3791,6492382.106
20040901,2004,107,3,0,3,443225.5024,6492352.173
20040901,2004,108,1,0,1,443405.0978,6492711.364
20040901,2004,109,1,0,1,442267.6603,6491933.117
20040901,2004,110,1,0,1,442177.8626,6492232.443
20040901,2004,111,43,0,43,442596.9185,6493549.476
20040901,2004,112,2,0,2,441848.6044,6493010.69
20040901,2004,113,2,0,2,443435.0304,6494357.655
20040901,2004,114,8,0,8,442806.4465,6495046.104
20040901,2004,115,43,0,43,442237.7278,6494537.25
20040901,2004,116,2,0,2,441459.4811,6494058.329
20040901,2004,117,1,0,1,439663.5272,6492651.499
20040901,2004,118,1,0,1,439902.9877,6493010.69
20040901,2004,119,2,0,2,440172.3808,6493369.88
20040901,2004,120,1,0,1,440651.3018,6493818.869
20040901,2004,121,2,0,2,438915.213,6493010.69
20040901,2004,122,2,0,2,439543.7969,6493339.948
20040901,2004,123,2,0,2,439723.3923,6493489.611
20040901,2004,124,1,0,1,439902.9877,6493609.341
20040901,2004,125,1,0,1,439962.8528,6493968.532
20040901,2004,126,1,0,1,438645.8199,6493190.285
20040901,2004,127,2,0,2,438196.8315,6493070.555
20040901,2004,128,1,0,1,438077.1012,6493429.745
20040901,2004,129,1,0,1,438825.4153,6494896.441
20040901,2004,130,2,0,2,443045.907,6496572.665
20040901,2004,131,1,0,1,443375.1652,6496662.462
20040901,2004,132,1,0,1,443285.3675,6497141.383
20040901,2004,133,24,0,24,442626.8511,6497141.383
20040901,2004,134,2,0,2,440771.0321,6495884.216
20040901,2004,135,5,0,5,440471.7064,6496423.002
20040901,2004,136,1,0,1,449930.397,6495405.295
20040901,2004,137,1,0,1,444572.4678,6496662.462
20040901,2004,138,2,0,2,445141.1866,6497590.372
20040901,2004,139,1,0,1,445470.4448,6497919.63
20040901,2004,140,2,0,2,445260.9168,6498428.484
20040901,2004,141,11,0,11,443315.3001,6498877.472
20040901,2004,142,5,0,5,443794.2211,6499446.191
20040901,2004,143,2,0,2,443015.9744,6499146.865
20040901,2004,144,14,0,14,442656.7837,6499386.326
20040901,2004,145,12,0,12,442866.3116,6499715.584
20040901,2004,146,1,0,1,443045.907,6500344.168
20040901,2004,147,1,0,1,443644.5583,6500254.37
20040901,2004,148,2,0,2,442147.9301,6501002.684
20040901,2004,149,3,0,3,431851.1277,6498817.607
20040901,2004,150,1,0,1,431940.9254,6499326.461
20040901,2004,151,2,0,2,430953.1507,6499535.989
20040901,2004,152,1,0,1,430983.0833,6502379.582
20040901,2004,153,1,0,1,429366.7248,6499895.179
20040901,2004,154,1,0,1,428738.1409,6500433.966
20040901,2004,155,1,0,1,427301.3778,6504355.132
20040901,2004,156,1,0,1,427031.9847,6500912.887
20040901,2004,157,3,0,3,427271.4452,6500344.168
20040901,2004,158,1,0,1,443770.6595,6479618.192
20041112,2004,1,1,0,1,439307.0771,6470021.766
20041112,2004,2,4,0,4,438761.9635,6468939.798
20041112,2004,3,1,0,1,439645.7082,6469550.986
20041112,2004,4,4,0,4,440083.451,6469724.431
20041112,2004,5,1,0,1,440446.86,6469559.245
20041112,2004,6,7,0,7,440017.3766,6470988.104
20041112,2004,7,2,0,2,439479.4899,6471613.745
20041112,2004,8,1,0,1,440026.6683,6471634.394
20041112,2004,9,1,0,1,440150.5578,6471809.904
20041112,2004,10,2,0,2,440078.2889,6471964.766
20041112,2004,11,1,0,1,439501.5835,6471959.48
20041112,2004,12,2,0,2,439198.3021,6472212.214
20041112,2004,13,1,0,1,438588.7118,6472922.328
20041112,2004,14,2,0,2,439049.4257,6473042.991
20041112,2004,15,2,0,2,438928.7626,6474085.082
20041112,2004,16,1,0,1,438533.8649,6473843.756
20041112,2004,17,1,0,1,438380.2936,6474841.969
20041112,2004,18,2,0,2,438532.4937,6477134.569
20041112,2004,19,2,0,2,437737.2138,6480055.166
20041112,2004,20,1,0,1,442395.7718,6479602.679
20041112,2004,21,2,0,2,443835.5028,6479383.292
20041112,2004,22,5,0,5,445083.2696,6471540.186
20041112,2004,23,5,0,5,444987.2875,6471320.798
20041112,2004,24,2,0,2,445439.7744,6471279.663
20041112,2004,25,2,0,2,437803.1747,6482682.367
20041112,2004,26,3,0,3,437374.6833,6483560.775
20041112,2004,27,1,0,1,435360.7739,6486860.158
20041112,2004,28,1,0,1,431718.5974,6486710.186
20041112,2004,29,9,0,9,432082.8151,6488467.001
20041112,2004,30,1,0,1,432575.5801,6489216.86
20041112,2004,31,1,0,1,434268.121,6490588.033
20041112,2004,32,1,0,1,431097.2849,6493137.556
20041112,2004,33,1,0,1,439160.9567,6487743.921
20041112,2004,34,1,0,1,438089.7283,6490689.8
20041112,2004,35,2,0,2,441571.2205,6490796.922
20041112,2004,36,38,0,38,440366.0886,6490957.607
20041112,2004,37,2,0,2,441008.8256,6490314.87
20041112,2004,38,3,0,3,441303.4134,6489939.94
20041112,2004,39,2,0,2,441008.8256,6489806.036
20041112,2004,40,2,0,2,440446.4307,6489832.817
20041112,2004,41,1,0,1,440258.9658,6489484.668
20041112,2004,42,2,0,2,440553.5536,6489190.08
20041112,2004,43,2,0,2,441008.8256,6489029.396
20041112,2004,44,2,0,2,443767.2387,6491868.151
20041112,2004,45,29,0,29,443954.7037,6492430.546
20041112,2004,46,1,0,1,442990.5982,6492296.642
20041112,2004,47,1,0,1,442722.7911,6492966.16
20041112,2004,48,1,0,1,442321.0804,6494251.634
20041112,2004,49,1,0,1,443258.4053,6493930.265
20041112,2004,50,5,0,5,443231.6245,6494921.152
20041112,2004,51,1,0,1,445549.388,6497588.715
20041112,2004,52,1,0,1,443317.6622,6499843.688
20041112,2004,53,3,0,3,443317.6622,6499448.486
20041112,2004,54,7,0,7,443643.1222,6499773.946
20041112,2004,55,9,0,9,444247.548,6499727.452
20041112,2004,56,11,0,11,444038.3237,6500192.395
20041112,2004,57,8,0,8,444317.2894,6500541.102
20041112,2004,58,5,0,5,444758.9852,6500308.631
20041112,2004,59,5,0,5,444898.468,6501587.224
20041112,2004,60,1,0,1,444433.5251,6501842.942
20041112,2004,61,30,0,30,443178.1794,6501587.224
20041112,2004,62,2,0,2,444665.9966,6502400.874
20041112,2004,63,2,0,2,443108.4379,6502865.817
20041112,2004,64,2,0,2,443875.5937,6502935.558
20041112,2004,65,3,0,3,443526.8865,6504097.915
20041112,2004,66,3,0,3,443596.628,6504353.634
20041112,2004,67,1,0,1,444154.5594,6505423.002
20041112,2004,68,1,0,1,443015.4494,6505701.968
20041207,2004,1,1,0,1,444676.9597,6471098.544
20041207,2004,2,13,0,13,445543.0504,6472730.792
20041207,2004,3,1,0,1,445543.0504,6474429.662
20041207,2004,4,1,0,1,445676.2951,6475129.197
20041207,2004,5,1,0,1,444110.6697,6474462.973
20041207,2004,6,11,0,11,438720.2545,6470111.2
20041207,2004,7,1,0,1,439594.3398,6469983.285
20041207,2004,8,2,0,2,439807.5314,6470473.626
20041207,2004,9,16,0,16,439295.8717,6471177.158
20041207,2004,10,5,0,5,439850.1697,6471219.796
20041207,2004,11,1,0,1,440105.9996,6471475.626
20041207,2004,12,1,0,1,439935.4463,6471731.456
20041207,2004,13,3,0,3,439106.1312,6472568.02
20041207,2004,14,1,0,1,439993.3492,6472672.398
20041207,2004,15,3,0,3,438427.6704,6473533.522
20041207,2004,16,2,0,2,439471.4562,6473690.09
20041207,2004,17,8,0,8,444293.7468,6479342.19
20041207,2004,18,1,0,1,443980.6111,6479425.693
20041207,2004,19,1,0,1,442665.4409,6479905.834
20041207,2004,20,1,0,1,442206.1752,6480385.976
20041207,2004,21,1,0,1,441788.6608,6480782.614
20041207,2004,22,1,0,1,441538.1522,6481158.377
20041207,2004,23,1,0,1,445433.2472,6483198.74
20041207,2004,24,10,0,10,444495.2043,6484205.004
20041207,2004,25,57,0,57,444375.8171,6484443.779
20041207,2004,26,1,0,1,443983.5446,6484153.838
20041207,2004,27,2,0,2,446036.9374,6484533.421
20041207,2004,28,2,0,2,446663.2089,6484115.907
20041207,2004,29,2,0,2,446997.2204,6485389.326
20041207,2004,30,3,0,3,446997.2204,6486067.787
20041207,2004,31,3,0,3,447519.1133,6486459.206
20041207,2004,32,3,0,3,443239.5914,6484893.528
20041207,2004,33,4,0,4,443657.1057,6485311.042
20041207,2004,34,2,0,2,444257.2826,6485337.137
20041207,2004,35,3,0,3,444205.0933,6485650.272
20041207,2004,36,1,0,1,445066.2166,6485493.704
20041207,2004,37,1,0,1,446057.8132,6486119.976
20041207,2004,38,4,0,4,443996.3361,6486824.531
20041207,2004,39,17,0,17,444700.8916,6486511.396
20041207,2004,40,5,0,5,444987.9327,6486850.626
20041207,2004,41,5,0,5,445692.4881,6487137.667
20041207,2004,42,5,0,5,444622.6076,6487268.14
20041207,2004,43,6,0,6,446971.1258,6487346.424
20041207,2004,44,12,0,12,449424.0225,6487215.951
20041207,2004,45,2,0,2,450154.6726,6487737.844
20041207,2004,46,9,0,9,443970.2415,6487581.276
20041207,2004,47,2,0,2,444178.9986,6487920.506
20041207,2004,48,1,0,1,444466.0397,6488338.021
20041207,2004,49,1,0,1,446397.0436,6487816.128
20041207,2004,50,3,0,3,446710.1793,6488103.169
20041207,2004,51,3,0,3,445744.6774,6488442.399
20041207,2004,52,4,0,4,445170.5952,6488703.346
20041207,2004,53,6,0,6,446005.6239,6488781.63
20041207,2004,54,3,0,3,443526.6325,6488546.778
20041207,2004,55,9,0,9,443552.7271,6488912.103
20041207,2004,56,1,0,1,443317.8753,6489512.28
20041207,2004,57,1,0,1,443891.9575,6489590.564
20041207,2004,58,9,0,9,446240.4757,6489747.132
20041207,2004,59,1,0,1,445405.447,6490686.539
20041207,2004,60,3,0,3,445901.2453,6491678.136
20041207,2004,61,2,0,2,447388.6401,6491730.325
20041207,2004,62,1,0,1,448354.142,6491104.053
20041207,2004,63,14,0,14,448771.6564,6490634.35
20041207,2004,64,1,0,1,448171.4795,6490008.078
20041207,2004,65,1,0,1,448432.426,6489486.185
20041207,2004,66,2,0,2,449032.6028,6488990.387
20041207,2004,67,21,0,21,449632.7797,6488729.441
20041207,2004,68,6,0,6,450441.7137,6489355.712
20041207,2004,69,1,0,1,440524.9957,6485112.536
20041207,2004,70,3,0,3,439957.3538,6485149.158
20041207,2004,71,1,0,1,440433.4405,6486925.328
20041207,2004,72,6,0,6,440048.9089,6486961.95
20041207,2004,73,1,0,1,442337.7875,6487602.836
20041207,2004,74,12,0,12,441056.0155,6487785.946
20041207,2004,75,5,0,5,440470.0626,6487932.434
20041207,2004,76,3,0,3,440122.1531,6488005.679
20041207,2004,77,3,0,3,439682.6884,6488628.253
20041207,2004,78,1,0,1,438767.1369,6489525.494
20041207,2004,79,1,0,1,440232.0192,6489836.781
20041207,2004,80,6,0,6,440140.4641,6490404.423
20041207,2004,81,4,0,4,440067.22,6491210.109
20041207,2004,82,4,0,4,440506.6847,6491063.62
20041207,2004,83,1,0,1,441971.5669,6490093.136
20041207,2004,84,8,0,8,441861.7008,6491466.463
20041207,2004,85,2,0,2,442630.764,6491759.439
20041207,2004,86,2,0,2,441788.4567,6491796.061
20041207,2004,87,1,0,1,442484.2757,6492455.258
20041207,2004,88,3,0,3,442978.6735,6492546.814
20041207,2004,89,2,0,2,442612.4529,6493041.211
20041207,2004,90,6,0,6,443473.0713,6492967.967
20041207,2004,91,3,0,3,443381.5161,6494817.381
20041207,2004,92,4,0,4,442411.0316,6495476.578
20041207,2004,93,4,0,4,443015.2956,6495458.267
20041207,2004,94,2,0,2,444168.8904,6495385.023
20041207,2004,95,2,0,2,446476.08,6495092.047
20041207,2004,96,2,0,2,436276.8371,6485313.957
20041207,2004,97,5,0,5,434757.0217,6487401.415
20041207,2004,98,1,0,1,433383.6946,6487822.568
20041207,2004,99,6,0,6,432925.9188,6487492.97
20041207,2004,100,4,0,4,432339.9659,6486852.084
20041207,2004,101,1,0,1,432010.3674,6487254.926
20041207,2004,102,4,0,4,439619.6012,6500119.568
20041207,2004,103,2,0,2,443075.8078,6499593.126
20041207,2004,104,4,0,4,443281.8069,6500668.899
20041207,2004,105,18,0,18,443304.6957,6501721.783
20041207,2004,106,22,0,22,443213.1405,6502225.337
20041207,2004,107,75,0,75,443281.8069,6502454.224
20041207,2004,108,13,0,13,442869.8087,6502797.556
20041207,2004,109,21,0,21,443190.2517,6503186.666
20041207,2004,110,11,0,11,443556.4723,6503003.555
20041207,2004,111,33,0,33,443968.4704,6502271.114
20041207,2004,112,20,0,20,442389.1442,6503392.665
20041207,2004,113,1,0,1,442663.8097,6507192.203
20041207,2004,114,1,0,1,441336.2601,6508016.199
20041207,2004,115,2,0,2,440100.2657,6509915.969
20041207,2004,116,1,0,1,435888.7291,6496571.807
20050603,2005,1,1,0,1,447739.2312,6470837.235
20050603,2005,2,2,0,2,446914.1623,6470793.231
20050603,2005,3,1,0,1,446178.1615,6470518.951
20050603,2005,4,1,0,1,439730.5617,6470364.195
20050603,2005,5,1,0,1,439873.5737,6470793.231
20050603,2005,6,1,0,1,439576.5488,6471123.259
20050603,2005,7,1,0,1,439884.5746,6472311.358
20050603,2005,8,96,44,140,439345.5295,6472916.409
20050603,2005,9,54,11,65,439312.5267,6473521.459
20050603,2005,10,4,1,5,438762.4808,6473510.458
20050603,2005,11,1,0,1,439169.5148,6473796.482
20050603,2005,12,1,1,2,438498.4587,6474071.505
20050603,2005,13,1,0,1,438036.4201,6478064.839
20050603,2005,14,1,0,1,440400.9302,6483338.663
20050603,2005,15,2,0,2,441238.8909,6484004.734
20050603,2005,16,1,0,1,443709.8006,6485100.529
20050603,2005,17,1,0,1,444010.607,6485938.489
20050603,2005,18,1,0,1,443172.6463,6486890.327
20050603,2005,19,1,0,1,443928.9596,6487320.05
20050603,2005,20,1,1,2,442433.522,6487354.428
20050603,2005,21,7,1,8,441367.8079,6487681.018
20050603,2005,22,2,0,2,441900.665,6488007.608
20050603,2005,23,3,1,4,441539.6973,6488626.409
20050603,2005,24,1,1,2,441144.3518,6488265.442
20050603,2005,25,1,0,1,443825.8259,6488592.032
20050603,2005,26,2,0,2,443808.637,6488849.866
20050603,2005,27,1,0,1,443671.1255,6488488.898
20050603,2005,28,1,0,1,445252.5077,6486752.815
20050603,2005,29,1,0,1,446352.5997,6487990.419
20050603,2005,30,2,0,2,443573.5697,6490538.812
20050603,2005,31,1,0,1,443133.2249,6490277.867
20050603,2005,32,4,0,4,441600.1728,6489739.668
20050603,2005,33,1,0,1,441225.0644,6490228.94
20050603,2005,34,2,0,2,441094.5918,6489348.25
20050603,2005,35,1,0,1,440898.8831,6489234.087
20050603,2005,36,1,0,1,440262.8295,6488907.906
20050603,2005,37,1,0,1,440279.1386,6489690.741
20050603,2005,38,1,0,1,439284.2857,6488940.524
20050603,2005,39,4,0,4,441502.3185,6491468.429
20050603,2005,40,3,0,3,442986.4433,6491713.065
20050603,2005,41,3,0,3,443394.1699,6491810.919
20050603,2005,42,12,0,12,440784.7196,6491794.61
20050603,2005,43,370,0,370,440654.2471,6490962.848
20050603,2005,44,3,0,3,444437.9501,6492153.41
20050603,2005,45,1,0,1,444682.586,6492528.518
20050603,2005,46,1,1,2,443247.3884,6492202.337
20050603,2005,47,2,0,2,442790.7346,6492381.737
20050603,2005,48,1,0,1,443720.3512,6492854.699
20050603,2005,49,1,0,1,443410.479,6493001.481
20050603,2005,50,26,8,34,442366.6989,6494045.261
20050603,2005,51,250,60,310,442350.3898,6494583.46
20050603,2005,52,9,0,9,442203.6082,6494991.187
20050603,2005,53,2,0,2,443883.4419,6494175.734
20050603,2005,54,1,0,1,443769.2784,6494746.551
20050603,2005,55,1,0,1,443002.7524,6495268.441
20050603,2005,56,1,1,2,443606.1878,6495627.24
20050603,2005,57,3,1,4,442845.7776,6495547.734
20050603,2005,58,73,26,99,442234.1877,6495629.279
20050603,2005,59,2,1,3,442845.7776,6496465.119
20050603,2005,60,75,22,97,442009.9381,6496567.05
20050603,2005,61,3,0,3,443681.6172,6496363.187
20050603,2005,62,1,1,2,437975.4832,6481108.096
20050603,2005,63,12,6,18,437779.7745,6481483.204
20050603,2005,64,1,1,2,437372.0478,6481874.622
20050603,2005,65,2,0,2,437763.4654,6481956.167
20050603,2005,66,6,1,7,436850.1578,6482347.585
20050603,2005,67,2,0,2,437290.5025,6482478.057
20050603,2005,68,1,0,1,437323.1207,6482771.62
20050603,2005,69,1,0,1,436817.5396,6482787.929
20050603,2005,70,1,0,1,437029.5575,6483375.056
20050603,2005,71,1,0,1,433914.5262,6490306.408
20050603,2005,72,1,0,1,433963.4533,6488055.757
20050603,2005,73,13,0,13,441938.5859,6498999.139
20050603,2005,74,20,0,20,442542.0213,6498966.521
20050603,2005,75,1,0,1,442346.3125,6498477.249
20050603,2005,76,1,0,1,442117.9856,6498460.94
20050603,2005,77,3,0,3,442737.7301,6496846.343
20050603,2005,78,45,15,60,442998.6751,6497384.542
20050603,2005,79,10,0,10,443471.638,6497580.251
20050603,2005,80,4,0,4,443830.4374,6497286.688
20050603,2005,81,3,0,3,442395.2397,6498102.141
20050603,2005,82,21,0,21,443047.6023,6498232.613
20050603,2005,83,6,0,6,441687.8341,6501035.734
20050603,2005,84,1,0,1,441504.3571,6501932.732
20050603,2005,85,1,0,1,444358.4434,6505072.227
20050603,2005,86,1,0,1,449765.3537,6487582.069
20060217,2006,1,16,0,16,439636.9591,6470497.61
20060217,2006,2,1,1,2,439855.1616,6470206.84
20060217,2006,3,1,0,1,440344.09,6469749.455
20060217,2006,4,3,0,3,439413.5488,6470017.577
20060217,2006,5,1,1,2,440454.4932,6471973.291
20060217,2006,6,2,0,2,440186.3712,6472824.973
20060217,2006,7,3,0,3,440091.7398,6473455.848
20060217,2006,8,7,0,7,438814.2171,6473771.286
20060217,2006,9,7,0,7,440580.6683,6475096.124
20060217,2006,10,2,0,2,438577.6389,6476657.541
20060217,2006,11,1,0,1,446179.6876,6471153.153
20060217,2006,12,1,0,1,446321.6346,6473408.533
20060217,2006,13,1,0,1,445895.7937,6475127.668
20060217,2006,14,3,0,3,446621.3004,6476389.419
20060217,2006,15,1,0,1,446621.3004,6478108.555
20060217,2006,16,2,0,2,445359.5496,6478518.624
20060217,2006,17,1,0,1,443971.6236,6478203.186
20060217,2006,18,1,0,1,442015.9099,6479875.006
20060217,2006,19,8,0,8,441763.5597,6481736.088
20060217,2006,20,2,0,2,443214.5731,6483470.996
20060217,2006,21,1,0,1,442331.3476,6484511.94
20060217,2006,22,2,0,2,449712.5899,6487477.054
20060217,2006,23,1,0,1,446700.1598,6486656.916
20060217,2006,24,3,0,3,447567.6135,6488391.824
20060217,2006,25,5,0,5,444870.6211,6486783.091
20060217,2006,26,7,0,7,444649.8147,6486514.969
20060217,2006,27,2,0,2,444602.4991,6486215.304
20060217,2006,28,2,0,2,444996.7962,6486199.532
20060217,2006,29,4,0,4,443466.9233,6486909.267
20060217,2006,30,4,0,4,439618.5833,6486814.635
20060217,2006,31,190,0,190,441463.8939,6488723.033
20060217,2006,32,39,0,39,442015.9099,6488234.105
20060217,2006,33,3,0,3,444365.9208,6488171.017
20060217,2006,34,5,0,5,443971.6236,6488644.174
20060217,2006,35,7,0,7,445627.6716,6489275.049
20060217,2006,36,2,2,4,444145.1144,6489401.224
20060217,2006,37,14,0,14,443577.3265,6489921.697
20060217,2006,38,8,0,8,445548.8122,6490410.625
20060217,2006,39,4,0,4,448261.5765,6490426.397
20060217,2006,40,2,0,2,448923.9956,6490804.922
20060217,2006,41,2,0,2,448797.8206,6491546.201
20060217,2006,42,1,0,1,448103.8576,6491688.148
20060217,2006,43,1,0,1,447441.4384,6491908.954
20060217,2006,44,23,0,23,445690.7591,6491467.341
20060217,2006,45,27,0,27,443183.0294,6491703.92
20060217,2006,46,3,0,3,443703.5016,6491972.042
20060217,2006,47,2,0,2,444287.0613,6492035.129
20060217,2006,48,6,0,6,442173.6287,6491214.991
20060217,2006,49,36,0,36,441258.8594,6491278.079
20060217,2006,50,7,0,7,441321.9469,6489574.715
20060217,2006,51,8,0,8,440959.1935,6489795.522
20060217,2006,52,6,0,6,439697.4427,6490442.169
20060217,2006,53,2,0,2,448813.5924,6494527.087
20060217,2006,54,170,0,170,444003.1674,6494353.596
20060217,2006,55,9,0,9,443482.6952,6493028.758
20060217,2006,56,1,0,1,443971.6236,6493312.652
20060217,2006,57,10,0,10,442126.3131,6493911.984
20060217,2006,58,96,0,96,442126.3131,6493202.249
20060217,2006,59,5,0,5,443104.1699,6494984.472
20060217,2006,60,2,0,2,443072.6262,6495394.541
20060217,2006,61,140,0,140,444176.6582,6495520.716
20060217,2006,62,100,0,100,440438.7213,6493801.58
20060217,2006,63,90,0,90,441274.6312,6494558.631
20060217,2006,64,15,0,15,441937.0504,6495221.05
20060217,2006,65,15,0,15,442157.8568,6495678.435
20060217,2006,66,5,0,5,440754.159,6494590.175
20060217,2006,67,44,0,44,439934.021,6494527.087
20060217,2006,68,1,0,1,439240.058,6495315.681
20060217,2006,69,21,0,21,441526.9814,6495773.066
20060217,2006,70,2,0,2,436243.3998,6484448.852
20060217,2006,71,4,0,4,434382.3174,6490221.362
20060217,2006,72,11,0,11,432710.4975,6489653.575
20060217,2006,73,16,0,16,440959.1935,6501861.014
20060217,2006,74,11,0,11,440974.9654,6502665.38
20060217,2006,75,2,0,2,440848.7903,6503343.571
20060217,2006,76,4,0,4,440044.4242,6505141.566
20060217,2006,77,3,0,3,443656.1859,6501766.383
20060217,2006,78,2,0,2,443183.0294,6503075.449
20060217,2006,79,1,0,1,439807.8459,6496467.029
20060217,2006,80,12,0,12,439382.005,6511103.339
20060217,2006,81,5,0,5,438309.5168,6511087.567
20060217,2006,82,5,0,5,443388.0639,6496467.029
20090526,2009,1,2,0,2,454118.7868,6471312.757
20090526,2009,2,34,0,34,439196.257,6470082.442
20090526,2009,3,2,0,2,439897.4042,6470558.693
20090526,2009,4,2,0,2,438812.6104,6472979.635
20090526,2009,5,1,0,1,438786.152,6473469.115
20090526,2009,6,2,0,2,446540.5441,6470722.252
20090526,2009,7,8,0,8,446000.793,6471579.503
20090526,2009,8,1,0,1,446328.877,6472362.672
20090526,2009,9,2,0,2,446434.7105,6472680.172
20090526,2009,10,1,0,1,438772.3619,6473759.674
20090526,2009,11,38,11,49,438698.2784,6474712.176
20090526,2009,12,1,0,1,438611.8477,6479085.968
20090526,2009,13,1,0,1,438069.4507,6479337.323
20090526,2009,14,1,0,1,437579.9706,6482499.1
20090526,2009,15,5,0,5,437738.7209,6483054.726
20090526,2009,16,230,0,230,436746.5314,6483001.809
20090526,2009,17,3,0,3,437368.3035,6483358.997
20090526,2009,18,1,1,2,437050.8029,6483464.831
20090526,2009,19,2,0,2,436984.6569,6483927.853
20090526,2009,20,11,0,11,437394.7619,6483888.165
20090526,2009,21,2,0,2,436111.5302,6483967.54
20090526,2009,22,2,0,2,435992.4674,6484390.874
20090526,2009,23,1,0,1,436270.2805,6484748.063
20090526,2009,24,6,0,6,436455.4892,6485356.605
20090526,2009,25,1,0,1,437050.8029,6485105.251
20090526,2009,26,1,0,1,436137.9885,6486362.024
20090526,2009,27,1,0,1,435913.0923,6487314.526
20090526,2009,28,1,0,1,436389.3432,6488240.57
20090526,2009,29,2,0,2,433769.963,6487896.611
20090526,2009,30,2,0,2,434206.5263,6488399.32
20090526,2009,31,2,0,2,432949.753,6488108.278
20090526,2009,32,3,0,3,433902.2549,6488862.342
20090526,2009,33,1,1,2,433941.9425,6489325.363
20090526,2009,34,2,0,2,436746.5314,6491415.576
20090526,2009,35,1,0,1,431481.3126,6493201.517
20090526,2009,36,1,0,1,430938.9156,6497633.297
20090526,2009,37,12,0,12,425276.821,6509222.07
20090526,2009,38,1,0,1,427737.4509,6504819.394
20090526,2009,39,2,0,2,436495.1768,6494447.707
20090526,2009,40,1,0,1,432658.7108,6512730.452
20090526,2009,41,3,0,3,433650.9002,6514053.371
20090526,2009,42,1,0,1,434047.776,6515468.895
20090526,2009,43,1,0,1,442368.9385,6507028.67
20090526,2009,44,1,0,1,438135.5967,6504713.561
20090526,2009,45,1,0,1,439141.0154,6504396.06
20090526,2009,46,1,0,1,439048.411,6502543.973
20090526,2009,47,1,0,1,442964.2522,6502835.015
20090526,2009,48,1,0,1,441866.2292,6502398.452
20090526,2009,49,30,0,30,441879.4584,6500625.74
20090526,2009,50,1,0,1,442395.3969,6500202.406
20090526,2009,51,2,0,2,449883.1202,6495320.834
20090526,2009,52,1,0,1,442223.4174,6498310.631
20090526,2009,53,1,0,1,445702.6952,6496828.962
20090526,2009,54,1,0,1,444922.1728,6497635.943
20090526,2009,55,1,0,1,443916.7541,6497807.922
20090526,2009,56,2,0,2,443017.169,6497715.318
20090526,2009,57,20,0,20,441244.4571,6497371.359
20090526,2009,58,37,0,37,441919.1459,6496511.461
20090526,2009,59,30,0,30,442368.9385,6496180.731
20090526,2009,60,150,0,150,442884.877,6496352.711
20090526,2009,61,1,0,1,440702.0602,6495625.105
20090526,2009,62,180,0,180,442342.4801,6495029.792
20090526,2009,63,70,23,93,443136.2317,6494738.749
20090526,2009,64,4,0,4,442196.959,6495453.126
20090526,2009,65,15,0,15,441495.8118,6495730.939
20090526,2009,66,10,0,10,442739.3559,6494976.875
20090526,2009,67,26,0,26,442408.6261,6494685.832
20090526,2009,68,4,0,4,442845.1895,6494434.478
20090526,2009,69,5,0,5,441641.3329,6495069.479
20090526,2009,70,1,0,1,441667.7913,6494619.687
20090526,2009,71,5,0,5,441694.2497,6494196.352
20090526,2009,72,7,0,7,441046.0192,6494196.352
20090526,2009,73,2,0,2,440093.5173,6494566.77
20090526,2009,74,12,0,12,443109.7733,6493812.706
20090526,2009,75,12,0,12,442236.6466,6493627.497
20090526,2009,76,2,0,2,444617.9013,6494659.374
20090526,2009,77,2,0,2,444207.7964,6494130.206
20090526,2009,78,3,0,3,445001.5479,6494765.208
20090526,2009,79,5,0,5,443242.0653,6495439.896
20090526,2009,80,4,0,4,443506.6491,6494990.104
20090526,2009,81,6,0,6,440384.5595,6492674.995
20090526,2009,82,4,0,4,440530.0807,6493402.601
20090526,2009,83,4,0,4,440979.8732,6493362.913
20090526,2009,84,28,0,28,443559.5659,6493111.559
20090526,2009,85,4,0,4,444829.5684,6493243.85
20090526,2009,86,1,0,1,438175.2843,6493204.163
20090526,2009,87,1,0,1,438294.347,6491722.493
20090526,2009,88,1,0,1,439418.8284,6489499.989
20090526,2009,89,2,0,2,439432.0576,6490359.886
20090526,2009,90,2,0,2,439193.9322,6490174.678
20090526,2009,91,450,0,450,440582.9974,6490889.054
20090526,2009,92,15,0,15,441919.1459,6489698.427
20090526,2009,93,7,0,7,442077.8963,6489261.863
20090526,2009,94,2,0,2,441138.6235,6488706.237
20090526,2009,95,2,0,2,443308.2112,6489724.885
20090526,2009,96,23,2,25,443625.7119,6490571.553
20090526,2009,97,3,0,3,445424.8821,6491404.993
20090526,2009,98,2,1,3,445808.5287,6491061.034
20090526,2009,99,1,0,1,446311.2381,6490121.761
20090526,2009,100,17,0,17,443599.2535,6488891.446
20090526,2009,101,1,0,1,446999.1561,6487661.131
20090526,2009,102,61,0,61,442104.3546,6488269.674
20090526,2009,103,29,0,29,441191.5403,6487872.798
20090526,2009,104,9,0,9,443996.1293,6487409.776
20090526,2009,105,11,2,13,444670.8181,6486708.629
20090526,2009,106,1,0,1,440225.8092,6486496.962
20090526,2009,107,1,0,1,440728.5186,6487065.817
20090526,2009,108,1,0,1,439842.1626,6485491.543
20090526,2009,109,1,0,1,440371.3303,6484737.479
20090526,2009,110,1,0,1,441839.7708,6485385.71
20090526,2009,111,1,0,1,442646.7516,6485200.501
20090526,2009,112,14,0,14,446298.0089,6484975.605
20090526,2009,113,19,0,19,445266.1318,6485081.438
20090526,2009,114,3,1,4,445107.3815,6485504.772
20090526,2009,115,1,0,1,444604.6721,6485385.71
20090526,2009,116,1,1,2,442236.6466,6483560.081
20090526,2009,117,1,0,1,440569.7682,6482567.892
20100422,2010,1,33,0,33,446135.6272,6470818.428
20100422,2010,2,2,0,2,446631.722,6473688.502
20100422,2010,3,1,0,1,447100.0354,6475126.462
20100422,2010,4,1,0,1,447139.723,6475728.391
20100422,2010,5,5,1,6,446975.9456,6476190.619
20100422,2010,6,6,0,6,447001.3456,6476882.77
20100422,2010,7,2,0,2,446604.4698,6478733.269
20100422,2010,8,1,0,1,444765.612,6479119.562
20100422,2010,9,12,1,13,443651.7139,6479556.125
20100422,2010,10,1,0,1,443187.3693,6479679.157
20100422,2010,11,1,0,1,448763.2261,6482824.05
20100422,2010,12,1,0,1,445552.5009,6482577.987
20100422,2010,13,3,1,4,445512.8134,6483062.176
20100422,2010,14,1,0,1,444988.9373,6482935.175
20100422,2010,15,1,0,1,444599.999,6483022.488
20100422,2010,16,1,1,2,444361.8736,6484363.928
20100422,2010,17,1,0,1,441927.8022,6483315.515
20100422,2010,18,1,0,1,445332.1298,6485344.936
20100422,2010,19,2,1,3,443509.147,6486096.355
20100422,2010,20,1,0,1,443681.1265,6485878.073
20100422,2010,21,1,1,2,444071.3877,6486327.865
20100422,2010,22,1,0,1,447108.2812,6485978.615
20100422,2010,23,1,0,1,447894.0953,6486994.617
20100422,2010,24,2,0,2,445679.5284,6487494.68
20100422,2010,25,1,0,1,443901.5248,6487169.242
20100422,2010,26,1,0,1,443869.7748,6487891.556
20100422,2010,27,1,0,1,443142.1691,6488074.119
20100422,2010,28,1,0,1,446494.1821,6488006.121
20100422,2010,29,1,0,1,445738.5306,6488158.521
20100422,2010,30,1,1,2,445865.5308,6488952.273
20100422,2010,31,1,0,1,447624.4844,6489244.373
20100422,2010,32,1,0,1,450125.5716,6487617.348
20100422,2010,33,1,0,1,449980.0504,6490726.208
20100422,2010,34,1,0,1,449860.9877,6488583.079
20100422,2010,35,2,0,2,447334.2118,6490501.312
20100422,2010,36,3,0,3,443730.5796,6489022.288
20100422,2010,37,3,1,4,443349.5788,6489191.622
20100422,2010,38,2,0,2,443677.6628,6489572.623
20100422,2010,39,3,0,3,443370.7456,6490112.374
20100422,2010,40,1,0,1,444735.9983,6490101.79
20100422,2010,41,1,0,1,443296.6621,6490821.459
20100422,2010,42,1,1,2,443254.3287,6491403.543
20100422,2010,43,1,1,2,445180.4992,6491340.043
20100422,2010,44,1,0,1,444958.2487,6492038.544
20100422,2010,45,1,0,1,447594.7422,6493254.032
20100422,2010,46,2,0,2,445372.2378,6492890.229
20100422,2010,47,1,0,1,445431.7692,6493452.47
20100422,2010,48,1,0,1,444638.0176,6493161.428
20100422,2010,49,1,0,1,444254.371,6493320.178
20100422,2010,50,3,1,4,443804.5784,6493816.273
20100422,2010,51,1,0,1,443639.2135,6494305.753
20100422,2010,52,1,1,2,443080.5006,6493158.782
20100422,2010,53,1,0,1,442770.9375,6493293.72
20100422,2010,54,1,1,2,442564.5621,6493650.908
20100422,2010,55,2,0,2,442199.4363,6493984.284
20100422,2010,56,18,0,18,440764.8415,6493035.465
20100422,2010,57,4,2,6,442098.0266,6494919.259
20100422,2010,58,12,0,12,442582.2151,6495205.01
20100422,2010,59,1,0,1,443026.716,6494863.697
20100422,2010,60,2,0,2,442653.6527,6495705.073
20100422,2010,61,3,0,3,442637.7777,6496141.637
20100422,2010,62,1,1,2,443891.9052,6496276.575
20100422,2010,63,2,1,3,443074.3411,6496205.137
20100422,2010,64,2,0,2,444503.0939,6496340.075
20100422,2010,65,3,0,3,446431.9103,6494847.822
20100422,2010,66,1,0,1,446812.911,6494443.008
20100422,2010,67,8,0,8,447701.9128,6494244.571
20100422,2010,68,1,0,1,449706.1356,6495347.885
20100422,2010,69,1,0,1,446390.667,6497317.325
20100422,2010,70,2,0,2,446474.4871,6498222.583
20100422,2010,71,1,0,1,443025.7529,6498354.769
20100422,2010,72,1,0,1,444394.9744,6501658.174
20100422,2010,73,3,0,3,440190.5404,6486602.536
20100422,2010,74,1,0,1,439460.2889,6486938.558
20100422,2010,75,1,0,1,440174.6653,6487748.184
20100422,2010,76,1,0,1,441111.2922,6487502.121
20100422,2010,77,7,0,7,441119.2297,6488002.185
20100422,2010,78,45,0,45,441174.7923,6488438.748
20100422,2010,79,52,0,52,441912.9813,6488303.81
20100422,2010,80,2,0,2,442151.1068,6488129.185
20100422,2010,81,7,0,7,441516.1055,6487906.935
20100422,2010,82,4,0,4,441619.2932,6487565.621
20100422,2010,83,2,0,2,442039.9816,6487811.684
20100422,2010,84,1,0,1,442357.4822,6487835.497
20100422,2010,85,1,0,1,439698.4144,6492493.231
20100422,2010,86,2,0,2,440261.978,6490143.727
20100422,2010,87,6,0,6,440650.9163,6490231.039
20100422,2010,88,1,0,1,440912.8543,6490453.29
20100422,2010,89,2,0,2,440301.6656,6490675.54
20100422,2010,90,45,0,45,440563.6036,6490802.54
20100422,2010,91,3,0,3,440254.0405,6490985.103
20100422,2010,92,24,0,24,440365.1657,6491318.479
20100422,2010,93,2,0,2,440690.6039,6491786.792
20100422,2010,94,2,0,2,439130.501,6501190.228
20100422,2010,95,1,0,1,438193.8741,6504485.884
20100422,2010,96,9,0,9,443209.0612,6500501.251
20100422,2010,97,3,0,3,442933.894,6500871.669
20100422,2010,98,15,0,15,443145.5611,6501273.836
20100422,2010,99,1,0,1,442542.3099,6501083.336
20100422,2010,100,3,0,3,443018.5609,6501940.587
20100422,2010,101,9,0,9,442066.059,6502977.756
20100422,2010,102,1,0,1,442044.8922,6502438.005
20100422,2010,103,4,0,4,441886.1419,6501051.586
20100422,2010,104,1,1,2,442341.2262,6501474.92
20100422,2010,105,1,0,1,443251.3947,6505894.529
20100422,2010,106,7,0,7,441875.5586,6505661.695
20100422,2010,107,1,0,1,442432.4452,6508088.725
20100422,2010,108,1,0,1,441384.6931,6507538.39
20100422,2010,109,1,0,1,440157.0239,6509390.477
20100422,2010,110,2,0,2,439881.8567,6509274.06
20100422,2010,111,1,0,1,439574.9394,6508945.976
20100422,2010,112,6,0,6,439712.523,6509686.811
20100422,2010,113,2,1,3,439236.2721,6510300.646
20100422,2010,114,8,0,8,438908.1881,6510237.146
20100422,2010,115,35,0,35,424992.1032,6509940.718
20100422,2010,116,3,0,3,423595.1004,6506837.149
20100422,2010,117,3,0,3,424579.3524,6506749.837
20100422,2010,118,2,0,2,422281.1024,6503556.327
20100422,2010,119,4,0,4,430405.1499,6497953.764
20100422,2010,120,2,0,2,430352.2332,6497339.929
20100422,2010,121,1,0,1,430553.3169,6496937.762
20100422,2010,122,1,0,1,431294.1517,6496313.344
20100422,2010,123,2,0,2,430817.9008,6495752.426
20100422,2010,124,35,0,35,429283.3144,6495890.01
20100422,2010,125,8,0,8,429537.3149,6495593.676
20100422,2010,126,12,0,12,429770.1487,6495498.426
20100422,2010,127,80,0,80,429907.7323,6495255.009
20100422,2010,128,2,0,2,431135.4014,6495138.592
20100422,2010,129,1,0,1,434008.6939,6497027.103
20100422,2010,130,1,0,1,434389.6947,6496910.686
20100422,2010,131,1,0,1,434146.2776,6497281.104
20100422,2010,132,2,0,2,435395.1134,6496921.269
20100422,2010,133,1,0,1,434731.8969,6487465.042
20100422,2010,134,1,0,1,434533.459,6488109.965
20100422,2010,135,2,0,2,435310.6741,6486836.656
20100422,2010,136,12,1,13,436064.5176,6486444.851
20100422,2010,137,2,0,2,436170.3512,6486243.767
20100422,2010,138,1,0,1,436329.1015,6485183.315
20100422,2010,139,1,0,1,436233.8513,6484707.064
20100422,2010,140,4,2,6,436307.9348,6484410.73
20100422,2010,141,3,0,3,436456.1017,6483489.978
20100422,2010,142,7,0,7,436022.1842,6483468.812
20100422,2010,143,7,0,7,436837.1025,6484082.646
20100422,2010,144,25,0,25,436487.8518,6483066.644
20100422,2010,145,3,0,3,436985.2695,6483204.228
20100422,2010,146,13,0,13,437196.9365,6482632.727
20100422,2010,147,2,0,2,436646.6021,6482685.643
20100422,2010,148,6,0,6,436593.6853,6482167.059
20100422,2010,149,8,0,8,437503.8538,6482495.143
20100422,2010,150,2,0,2,437154.6031,6482262.309
20100422,2010,151,2,0,2,437567.354,6481997.725
20100422,2010,152,180,0,180,437482.6871,6481659.058
20100422,2010,153,3,0,3,437842.5212,6481637.891
20100422,2010,154,9,0,9,437853.1045,6481269.591
20100422,2010,155,5,0,5,437810.7711,6480806.04
20100422,2010,156,3,0,3,437715.5209,6480636.706
20100422,2010,157,5,0,5,437630.8541,6480382.706
20100422,2010,158,1,0,1,437387.4369,6479842.954
20100422,2010,159,1,0,1,437726.1043,6479673.621
20100422,2010,160,2,0,2,437525.0205,6478985.703
20100422,2010,161,1,0,1,437334.5202,6478710.536
20100422,2010,162,2,0,2,437652.0208,6478467.118
20100422,2010,163,2,0,2,438212.9386,6477893.501
20100422,2010,164,4,0,4,438287.0221,6476634.081
20100422,2010,165,7,0,7,438974.9401,6476352.564
20100422,2010,166,3,0,3,439027.8569,6475982.147
20100422,2010,167,7,0,7,438964.3567,6475071.978
20100422,2010,168,2,0,2,438731.5229,6474468.727
20100422,2010,169,1,1,2,438869.1066,6473158.508
20100422,2010,170,20,0,20,438826.7731,6470106.797
20100422,2010,171,25,0,25,439263.3365,6470241.735
20100422,2010,172,1,0,1,437596.4582,6469670.234
20100422,2010,173,1,0,1,439120.4612,6469503.546
